# Supplementary material for: HER2 Expression Is Predictive of Survival in Cetuximab Treated Patients with RAS Wild Type Metastatic Colorectal Cancer
Source: PubMed Central journal article supplement (PMC7914886; doi:10.3390/cancers13040638), 2021-02-05
Supplement: cancers-13-00638-s001.pdf [file cancers-13-00638-s001.pdf]

# HER2 Expression Is Predictive of Survival in Cetuximab Treated Patients with RAS Wild Type Metastatic Colorectal Cancer

Said A. Khelwatty, Soozana Puvanenthiran, Sharadah Essapen, Izhar Bagwan, Alan M. Seddon and Helmout Modjtahedi

**Table S1.** The association between co-expression of HER family members and OS and PFS in mCRC patients treated with cetuximab as determined by Kaplan-Meier analysis and the log-rank test. P-value of  $\leq 0.05$  was considered significant.

| Variables            |     | Number of Patients | OS in Months (mean $\pm$ SE) | 95% CI    | p-value | PFS in months (mean $\pm$ SE) | 95% CI    | p-value |
|----------------------|-----|--------------------|------------------------------|-----------|---------|-------------------------------|-----------|---------|
| EGFR HER2            | -ve | 110                | 65.7 $\pm$ 3.7               | 58.4–72.9 | 0.130   | 58.7 $\pm$ 5.0                | 48.8–68.6 | 0.356   |
|                      | +ve | 34                 | 53.0 $\pm$ 4.6               | 43.9–62.1 |         | 32.5 $\pm$ 4.1                | 24.5–40.6 |         |
| EGFR HER3            | -ve | 115                | 65.6 $\pm$ 3.7               | 58.4–72.8 | 0.136   | 58.9 $\pm$ 4.9                | 49.2–68.7 | 0.271   |
|                      | +ve | 29                 | 53.0 $\pm$ 4.8               | 43.6–62.4 |         | 32.2 $\pm$ 4.3                | 23.8–40.7 |         |
| EGFR HER4            | -ve | 127                | 64.4 $\pm$ 3.5               | 57.6–71.3 | 0.316   | 55.6 $\pm$ 4.8                | 46.3–65.0 | 0.977   |
|                      | +ve | 17                 | 54.8 $\pm$ 6.9               | 41.3–68.4 |         | 35.7 $\pm$ 5.9                | 24.2–47.3 |         |
| HER2 HER3            | -ve | 35                 | 56.1 $\pm$ 5.9               | 44.6–67.6 | 0.147   | 45.9 $\pm$ 6.0                | 34.0–57.7 | 0.789   |
|                      | +ve | 109                | 65.7 $\pm$ 3.9               | 57.9–73.4 |         | 55.4 $\pm$ 4.9                | 45.8–65.0 |         |
| HER2 HER4            | -ve | 76                 | 61.3 $\pm$ 4.1               | 53.3–69.3 | 0.651   | 42.2 $\pm$ 4.2                | 34.1–50.4 | 0.575   |
|                      | +ve | 68                 | 64.5 $\pm$ 4.5               | 55.7–73.3 |         | 57.9 $\pm$ 6.1                | 45.9–69.9 |         |
| HER3 HER4            | -ve | 87                 | 60.5 $\pm$ 3.7               | 53.2–67.7 | 0.535   | 42.2 $\pm$ 3.9                | 34.6–49.7 | 0.419   |
|                      | +ve | 57                 | 65.1 $\pm$ 5.0               | 55.2–75.0 |         | 59.2 $\pm$ 6.7                | 46.1–72.2 |         |
| EGFR HER2HER3        | -ve | 117                | 65.3 $\pm$ 3.7               | 58.1–72.4 | 0.200   | 58.8 $\pm$ 4.9                | 49.1–68.5 | 0.287   |
|                      | +ve | 27                 | 53.9 $\pm$ 5.0               | 44.2–63.8 |         | 32.4 $\pm$ 4.4                | 23.7–41.1 |         |
| EGFR HER2HER4        | -ve | 126                | 64.1 $\pm$ 3.5               | 57.2–71.0 | 0.523   | 56.3 $\pm$ 4.8                | 46.9–65.7 | 0.830   |
|                      | +ve | 18                 | 56.8 $\pm$ 6.5               | 44.1–69.4 |         | 34.8 $\pm$ 5.5                | 24.1–45.6 |         |
| EGFR HER3HER4        | -ve | 129                | 64.2 $\pm$ 3.5               | 57.3–71.1 | 0.476   | 56.3 $\pm$ 4.8                | 46.9–65.7 | 0.777   |
|                      | +ve | 15                 | 56.8 $\pm$ 6.46              | 44.1–69.4 |         | 35.6 $\pm$ 5.9                | 24.1–47.1 |         |
| HER2 HER3HER4        | -ve | 88                 | 60.6 $\pm$ 3.7               | 53.3–67.8 | 0.560   | 42.5 $\pm$ 3.8                | 34.9–49.9 | 0.505   |
|                      | +ve | 56                 | 64.9 $\pm$ 5.1               | 55.1–74.9 |         | 58.7 $\pm$ 6.7                | 45.2–71.6 |         |
| EGFRHER2<br>HER3HER4 | -ve | 129                | 64.2 $\pm$ 3.5               | 57.3–71.1 | 0.476   | 56.3 $\pm$ 4.8                | 46.9–65.7 | 0.777   |
|                      | +ve | 15                 | 56.8 $\pm$ 6.5               | 44.1–69.4 |         | 35.6 $\pm$ 5.9                | 24.1–47.1 |         |

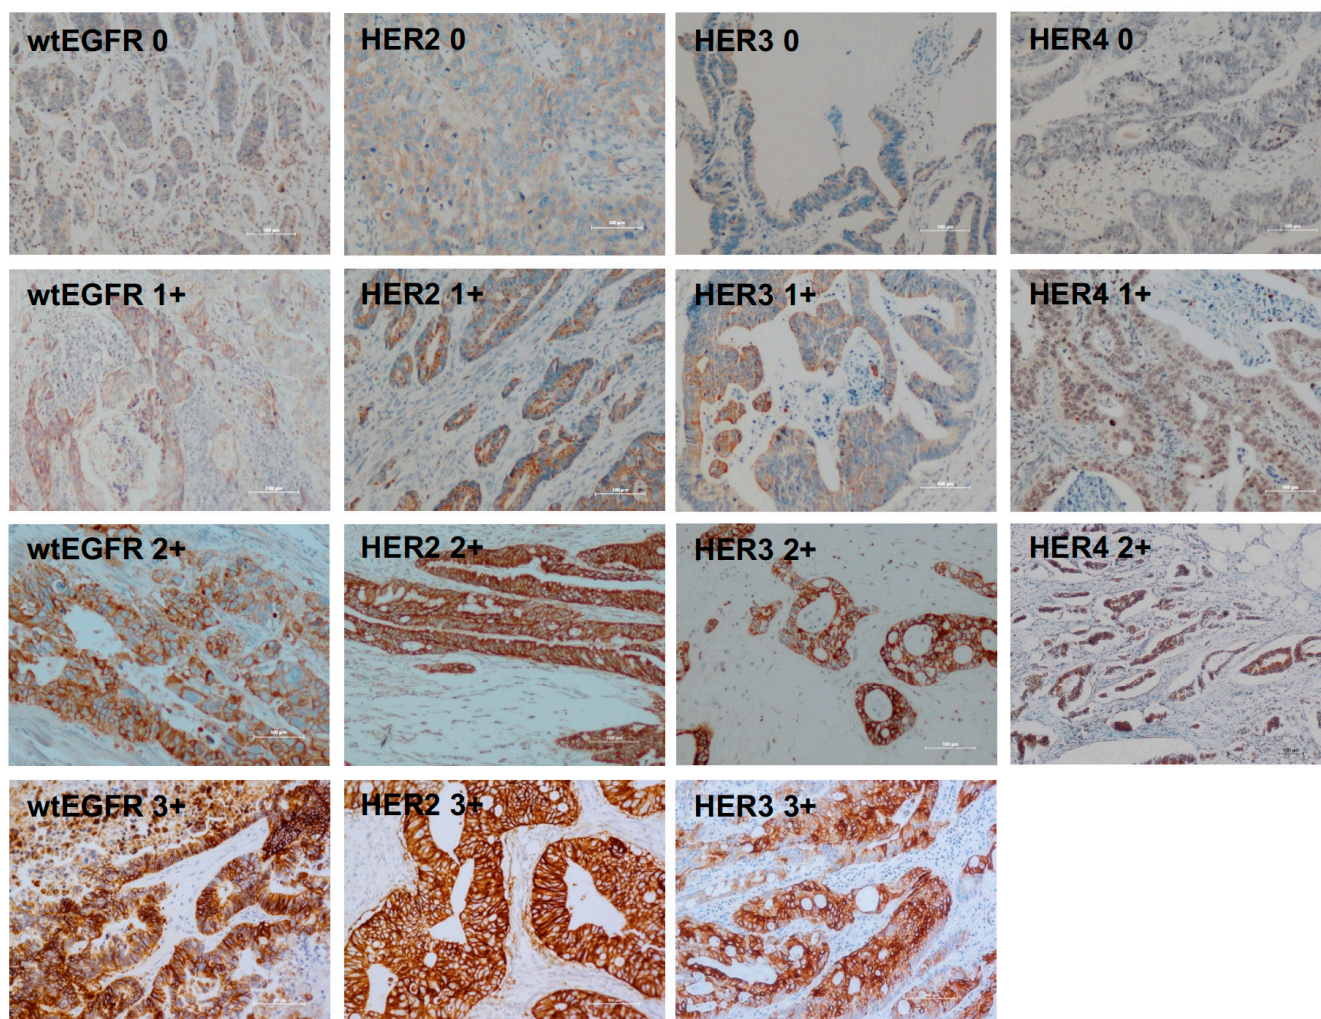

**Figure S1.** Immunostaining of HER family members in mCRC specimens at various intensities. Immunostaining of wtEGFR, HER2, HER3, and HER4 in formalin fixed paraffin embedded tumour sections stained immunohistochemically using the Ultra Discovery Autostainer as described previously.
